# Supplementary material for: Heterogeneity of paclitaxel distribution in different tumor models assessed by MALDI mass spectrometry imaging
Source: PubMed Central journal article supplement (PMC5175283; doi:10.1038/srep39284), 2016-12-21
Supplement: srep39284-s1.pdf [file srep39284-s1.pdf]

# *Heterogeneity of paclitaxel distribution in different tumor models assessed by MALDI mass spectrometry imaging*

Giordano Silvia<sup>2</sup>, Zucchetti Massimo<sup>1</sup>, Decio Alessandra<sup>1</sup>, Cesca Marta<sup>1</sup>, Fuso Nerini Ilaria<sup>1</sup>, Maiezza Marika<sup>1</sup>, Ferrari Mariella<sup>1</sup>, Licandro Simonetta Andrea<sup>1</sup>, Frapolli Roberta<sup>1</sup>, Giavazzi Raffaella<sup>1</sup>, D'Incalci Maurizio<sup>1</sup>, Davoli Enrico<sup>2</sup>, Morosi Lavinia<sup>1</sup>.

*1 Department of Oncology, IRCCS Istituto di Ricerche Farmacologiche Mario Negri, Via La Masa, 19 – 20156 Milano, Italy*

*2 Mass Spectrometry Laboratory, IRCCS Istituto di Ricerche Farmacologiche Mario Negri, Via La Masa, 19 – 20156 Milano, Italy*

Corresponding author: Morosi Lavinia

## **Content:**

- The normalization with internal standard approach increases reproducibility reducing signal variability due to inhomogeneous matrix deposition, analyte extraction or laser shot to shot variability. RSD % in ROI drawn on the entire section of different organs, in fact decrease in a statistically significant way after normalization (\*\*\* student t test p-value < 0.001) **Figure S-1**
- A second series of normalized images of the PTX distribution in four non-consecutive sections of liver, spleen and tumor. Corresponding optical scans are shown under the MSI images. **Figure S-2**
- The reproducibility of the MSI method to visualize paclitaxel was confirmed by the comparison of the mean spectra calculated in a ROI including the whole section of 4 non adjacent sections (about 300µm between sections) of liver, spleen and tumor. **Figure S-3**
- The mean PTX/d5-PTX ratio, the standard deviation (SD) and the internal standard ion signal calculated in a ROI including the whole section do not vary in a significant way comparing the two series of sections for each organ analyzed **Table S-1**
- Quantitative analysis of PTX distribution inside tumor sections by MSI. PTX/mm<sup>2</sup> was calculated from PTX/d5PTX ratio in three randomly selected ROIs for each color band in three sections for each tumor (3 tumors) respectively 4.76 times and 2.09 times higher than in the blue and green zones.

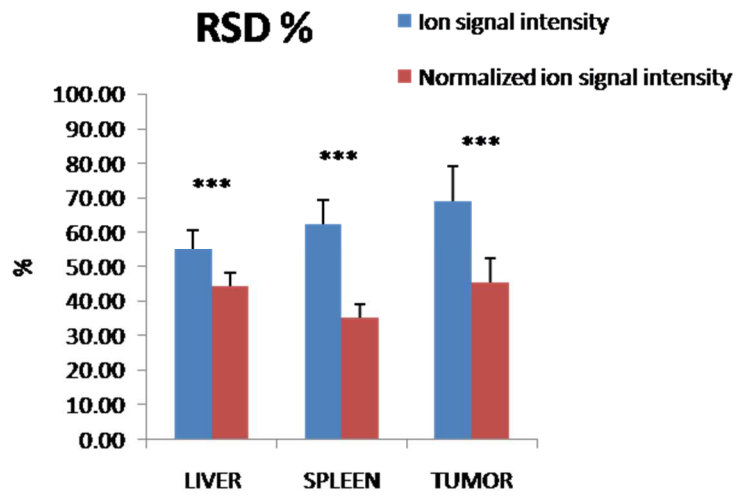

Figure S-1

SECTION # 1

2

3

4

LIVER

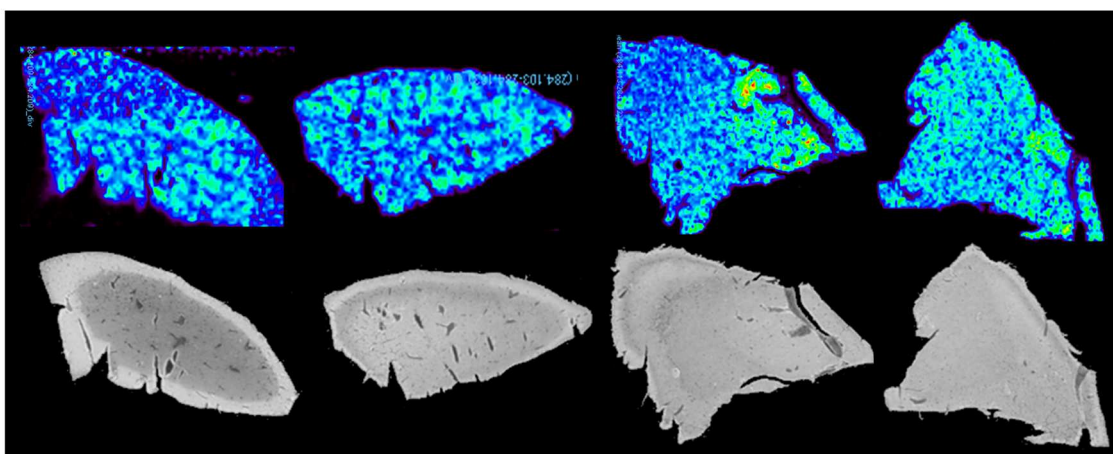

SPLEEN

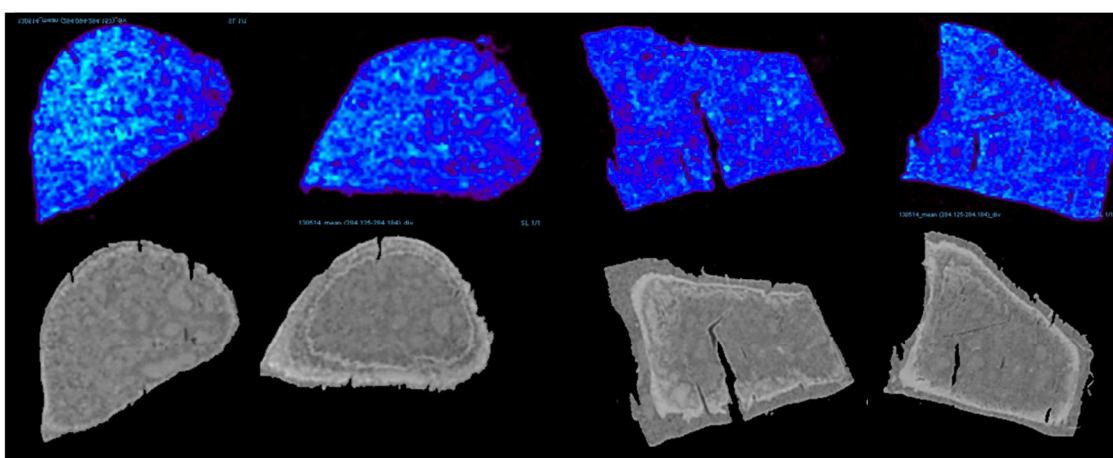

TUMOR

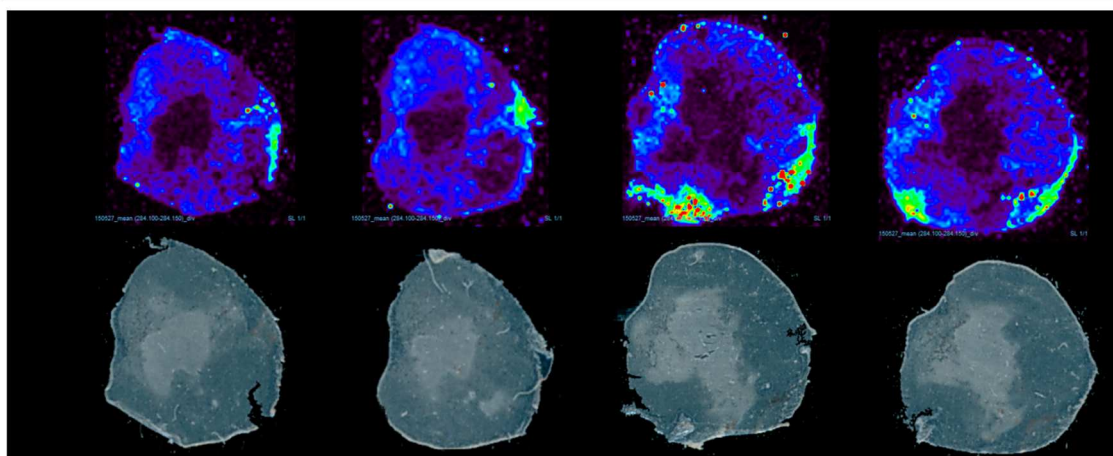

Figure S-2

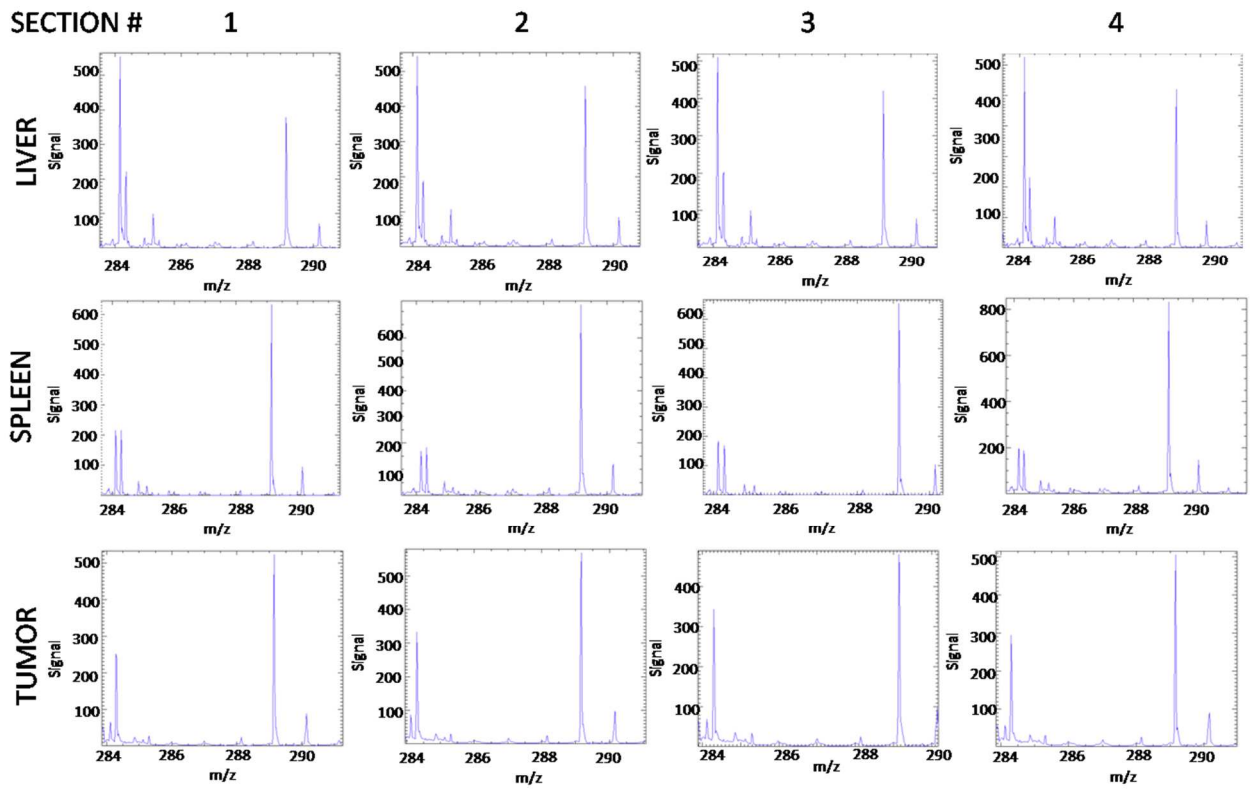

Figure S-3

**Table S-1**

|                |           | Ratio PTX/dPTX | m/z 289.2 |
|----------------|-----------|----------------|-----------|
| Organ          | Section # | MEAN           | MEAN      |
| LIVER A        | 1         | 2.049          | 233.580   |
|                | 2         | 1.394          | 255.650   |
|                | 3         | 1.247          | 271.460   |
|                | 4         | 1.575          | 284.880   |
| LIVER B        | 1         | 1.862          | 204.175   |
|                | 2         | 2.316          | 259.746   |
|                | 3         | 1.822          | 206.164   |
|                | 4         | 1.677          | 233.654   |
| p value test T |           | 0.164          | 0.084     |
| SPLEEN A       | 1         | 0.251          | 288.740   |
|                | 2         | 0.310          | 366.199   |
|                | 3         | 0.319          | 309.298   |
|                | 4         | 0.387          | 370.474   |
| SPLEEN B       | 1         | 0.310          | 308.531   |
|                | 2         | 0.378          | 342.738   |
|                | 3         | 0.400          | 243.965   |
|                | 4         | 0.482          | 296.948   |
| p value test T |           | 0.143          | 0.264     |
| TUMOR A        | 1         | 0.187          | 262.682   |
|                | 2         | 0.158          | 311.040   |
|                | 3         | 0.184          | 276.485   |
|                | 4         | 0.187          | 255.133   |
| TUMOR B        | 1         | 0.200          | 282.242   |
|                | 2         | 0.179          | 319.642   |
|                | 3         | 0.203          | 318.551   |
|                | 4         | 0.169          | 230.429   |
| p value test T |           | 0.468          | 0.657     |

**Table S-2**

|       | Tumor | Section # | PTX/dPTX | pmol/mm2 | MEAN  | DEV ST | MEAN  | DEV ST |
|-------|-------|-----------|----------|----------|-------|--------|-------|--------|
| BLUE  | A     | 1         | 0.089    | 0.559    | 0.476 | 0.072  | 0.552 | 0.135  |
|       |       | 2         | 0.069    | 0.441    |       |        |       |        |
|       |       | 3         | 0.067    | 0.429    |       |        |       |        |
|       | B     | 1         | 0.065    | 0.418    | 0.473 | 0.049  |       |        |
|       |       | 2         | 0.081    | 0.512    |       |        |       |        |
|       |       | 3         | 0.077    | 0.488    |       |        |       |        |
|       | C     | 1         | 0.121    | 0.747    | 0.708 | 0.244  |       |        |
|       |       | 2         | 0.152    | 0.929    |       |        |       |        |
|       |       | 3         | 0.07     | 0.447    |       |        |       |        |
| GREEN | A     | 1         | 0.196    | 1.188    | 1.218 | 0.164  | 1.261 | 0.194  |
|       |       | 2         | 0.176    | 1.071    |       |        |       |        |
|       |       | 3         | 0.231    | 1.394    |       |        |       |        |
|       | B     | 1         | 0.182    | 1.106    | 1.092 | 0.063  |       |        |
|       |       | 2         | 0.168    | 1.024    |       |        |       |        |
|       |       | 3         | 0.189    | 1.147    |       |        |       |        |
|       | C     | 1         | 0.329    | 1.971    | 1.473 | 0.431  |       |        |
|       |       | 2         | 0.201    | 1.218    |       |        |       |        |
|       |       | 3         | 0.203    | 1.229    |       |        |       |        |
| RED   | A     | 1         | 0.412    | 2.459    | 2.722 | 0.265  | 2.631 | 0.436  |
|       |       | 2         | 0.456    | 2.718    |       |        |       |        |
|       |       | 3         | 0.502    | 2.988    |       |        |       |        |
|       | B     | 1         | 0.307    | 1.841    | 2.157 | 0.497  |       |        |
|       |       | 2         | 0.317    | 1.900    |       |        |       |        |
|       |       | 3         | 0.458    | 2.729    |       |        |       |        |
|       | C     | 1         | 0.549    | 3.265    | 3.014 | 0.242  |       |        |
|       |       | 2         | 0.467    | 2.782    |       |        |       |        |
|       |       | 3         | 0.503    | 2.994    |       |        |       |        |
